# Supplementary figures and images for: MicroRNA-383 located in frequently deleted chromosomal locus 8p22 regulates CD44 in prostate cancer
Source: Springer Nature journal article supplement (doi:10.1038/onc.2016.419), 2016-11-28

**Fig. S6 CD44 knockdown induces G0-G1 cell cycle arrest in Du145 cell line**

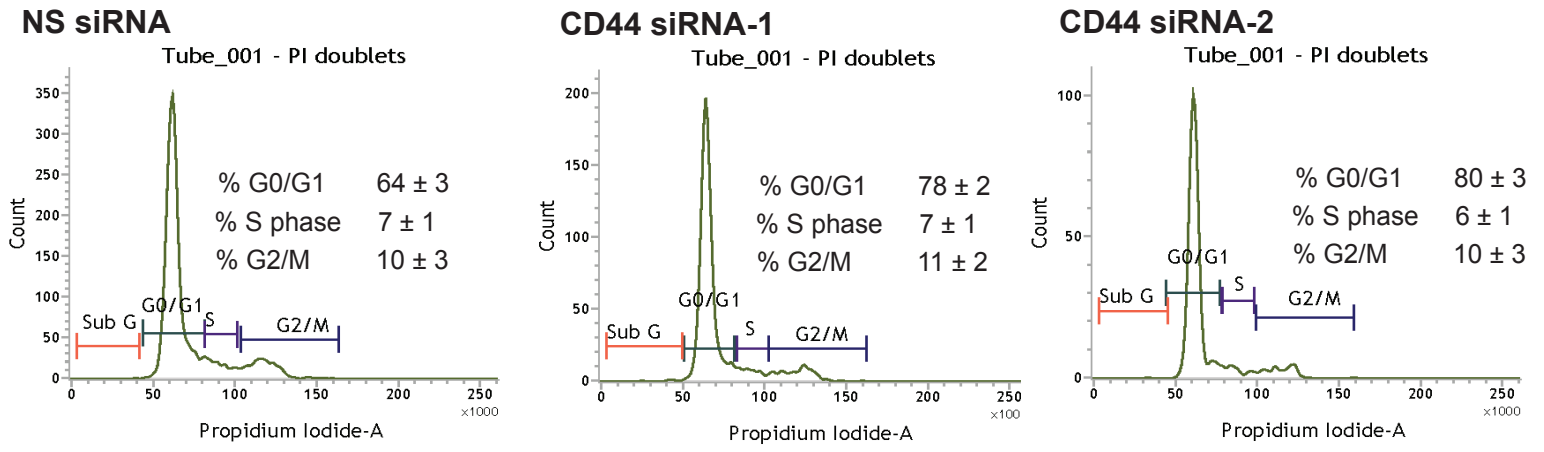

Supplement: 41388_2017_BFonc2016419_MOESM13_ESM.pdf [file 41388_2017_BFonc2016419_MOESM13_ESM.pdf]

Fig. S2 miR-383 silencing induces tumorigenicity in normal prostate epithelial cells

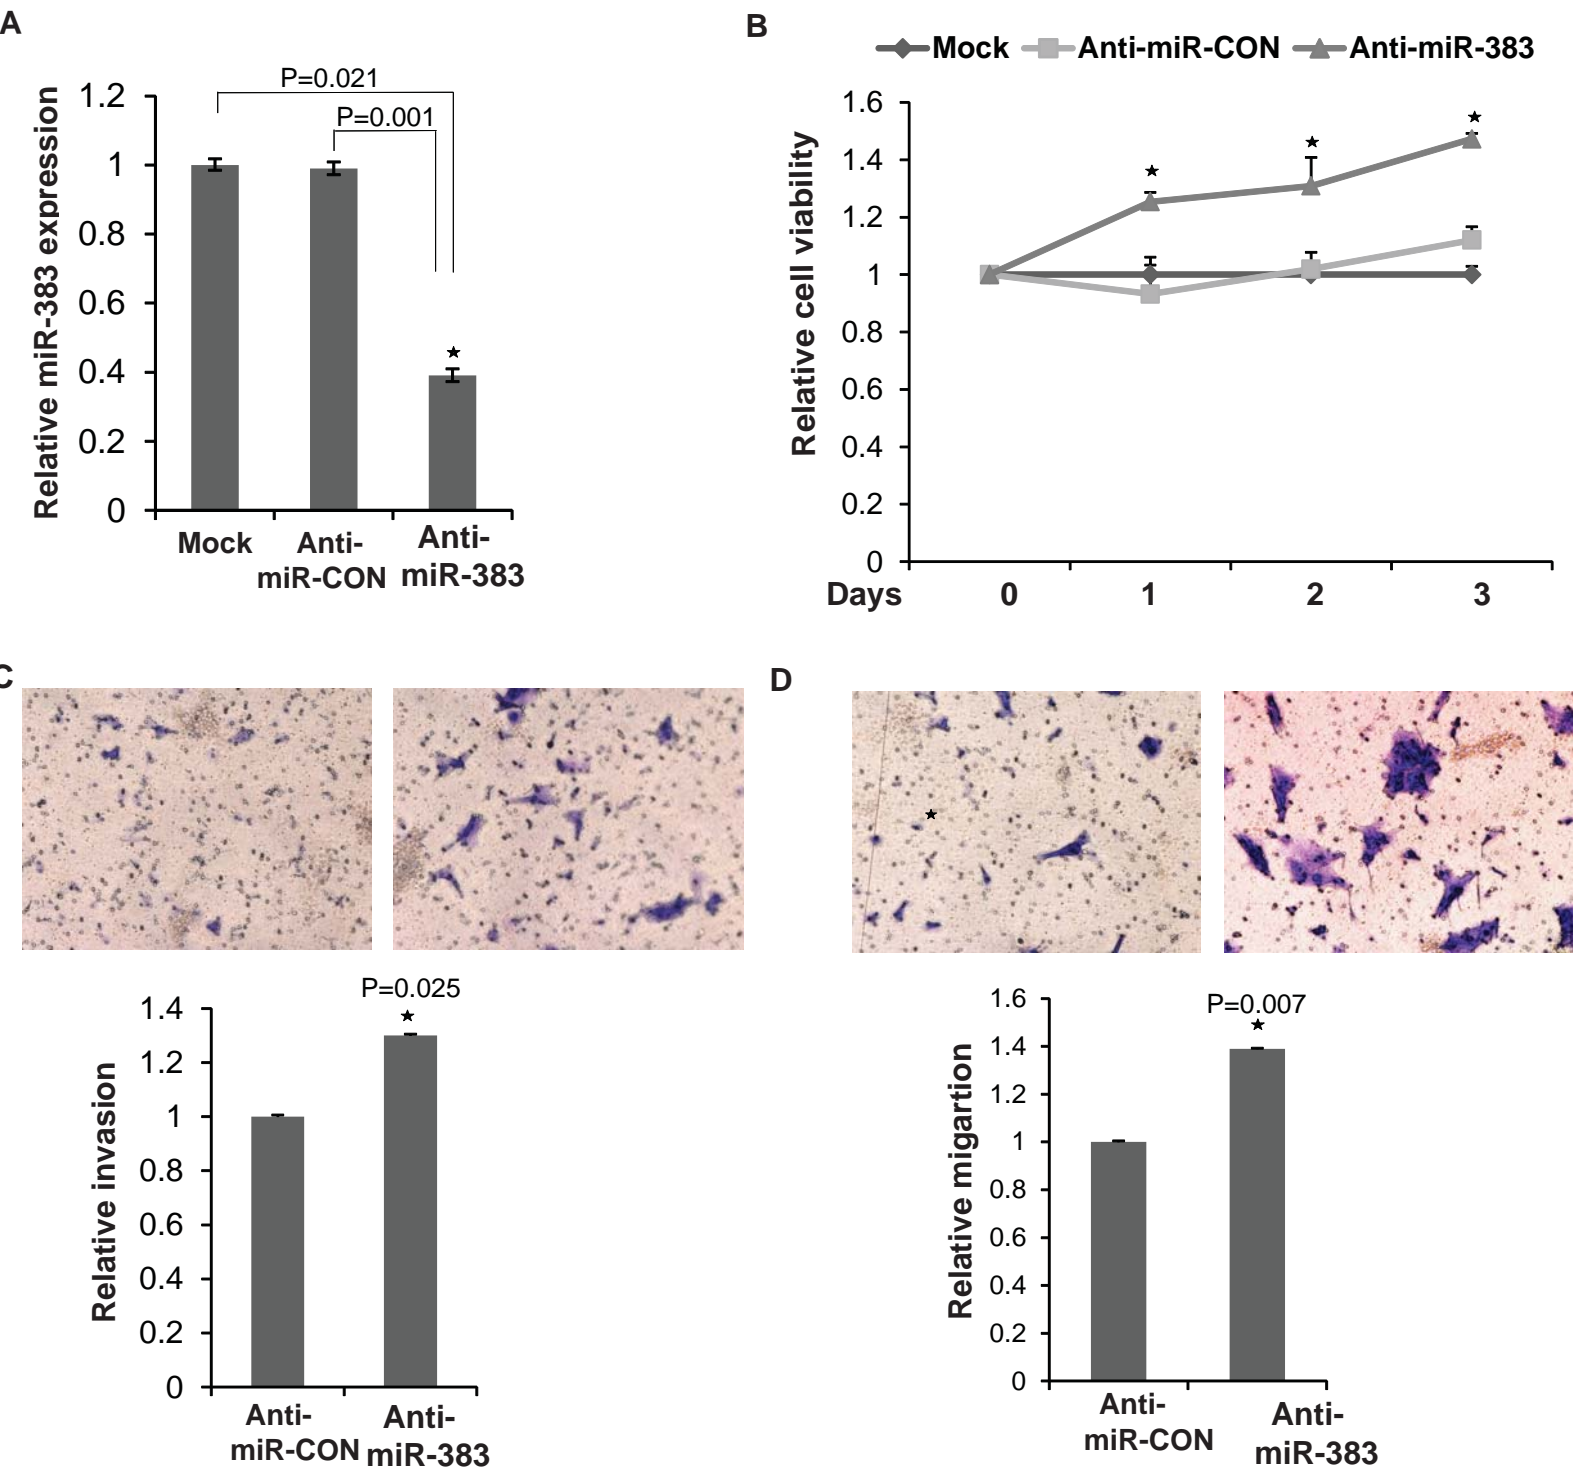

Supplement: 41388_2017_BFonc2016419_MOESM9_ESM.pdf [file 41388_2017_BFonc2016419_MOESM9_ESM.pdf]
